# Supplementary material for: A framework to support risk assessment in hospitals
Source: PubMed Central journal article supplement (PMC6528703; doi:10.1093/intqhc/mzy194), 2018-09-01
Supplement: mzy194_raf_final_cards_bw.pdf [file mzy194_raf_final_cards_bw.pdf]

## Risk Assessment Framework

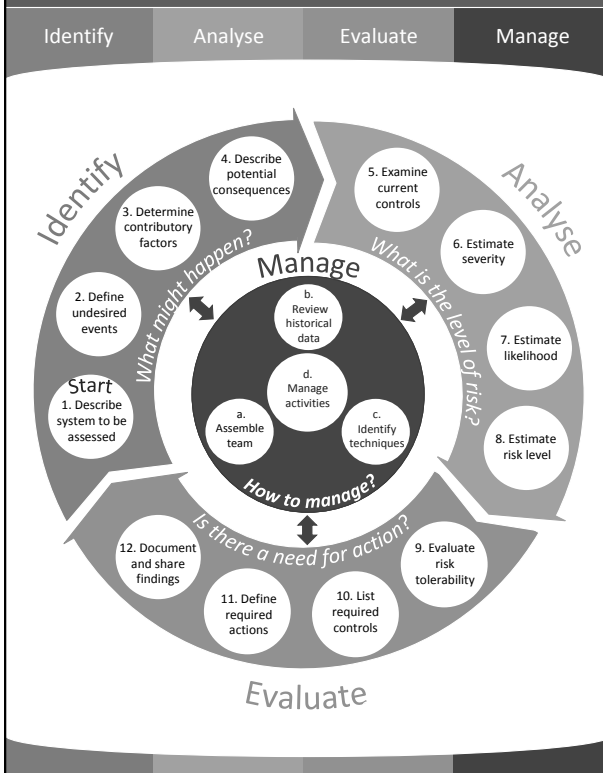

## Risk Assessment Framework

This framework provides guidance on risk assessment. It contains four steps: *Identify*, *Analyse*, *Evaluate* and *Manage* steps.

–*Identify* addresses the question of “*What might happen?*”

–*Analyse* addresses the question of “*What is the level of risk?*”

–*Evaluate* addresses the question of “*Is there a need for action?*”

–*Manage* supports the management of all steps

This framework is intended as a guide. It can be tailored to fit assessment needs

GKK

## Risk Assessment Framework

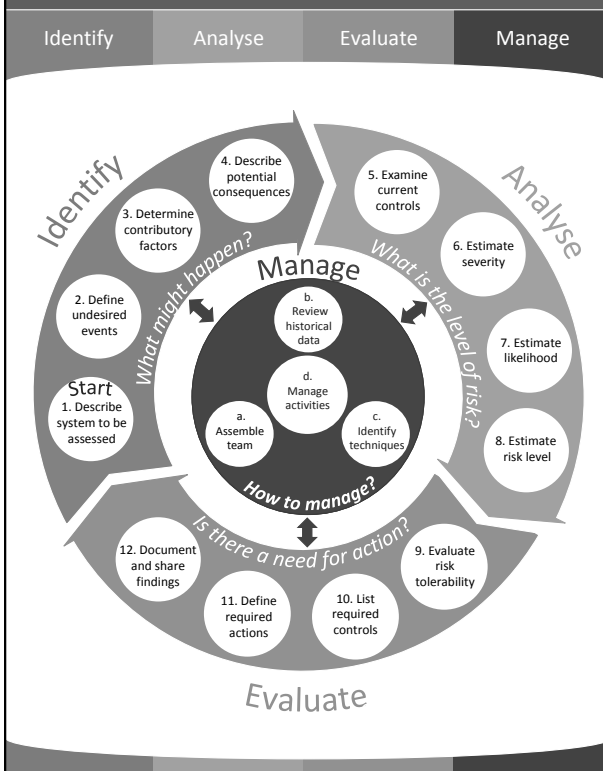

## Glossary

|                       |                                                                                                                |
|-----------------------|----------------------------------------------------------------------------------------------------------------|
| Consequence:          | Outcome of an <b>event</b>                                                                                     |
| Contributory factors: | Factors that contribute to the occurrence of an <b>event</b>                                                   |
| Control:              | A measure that modified the <b>risk</b> <sup>1</sup>                                                           |
| Event:                | Occurrence of a particular set of circumstances <sup>1</sup>                                                   |
| Likelihood:           | Chance of a <b>risk</b> occurring <sup>1</sup>                                                                 |
| Risk:                 | A potential undesired <b>event</b> that has effect(s) on objectives                                            |
| Risk level:           | Magnitude of a <b>risk</b> expressed by combining <b>consequences</b> and their <b>likelihood</b> <sup>1</sup> |
| Tolerability:         | The degree of acceptability of a <b>risk</b>                                                                   |
| Severity:             | Seriousness of a <b>consequence</b>                                                                            |
| System:               | A combination of interacting elements organised to achieve stated purpose(s) <sup>2</sup>                      |

1. ISO 73:2009, 2009. *Risk management- vocabulary*

2. ISO/IEC 15288, 2008. *Systems and software engineering- system life cycle processes*

## Describe system to be assessed 01

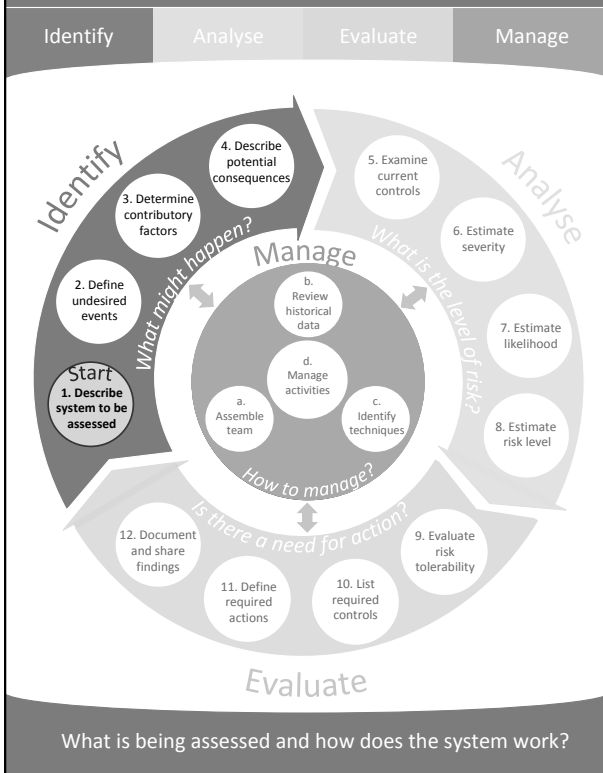

## Describe system to be assessed 01

The following factors should be considered to describe the system to be assessed:

– Assessment aim

*What does the assessment aim to achieve?*

– System elements

*What are the parts of the system?*

– Interactions of the system elements

*What is the relationship between the system elements?*

– System boundary

*What is the scope of the system?*

– System context

*What is around the system to be assessed?*

Since the following steps will be built on this step, it is essential to describe the system well.

What is being assessed and how does the system work?

## Define undesired events 02

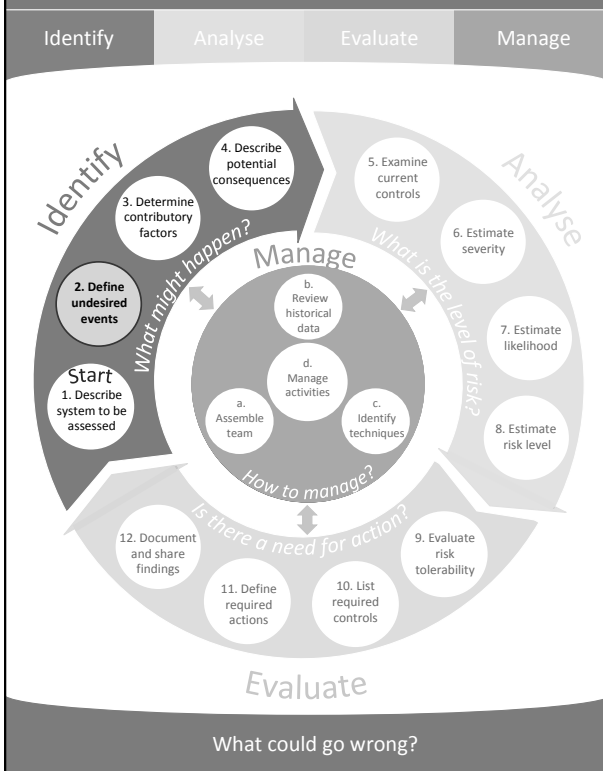

## Define undesired events 02

The following should be considered when defining undesired events:

– System description (i.e. aim, elements, interactions, boundary and context)

– Extreme cases (e.g. fire)

Undesired events can be related to:

– Clinical practice (e.g. delayed discharge)

– Organisation (e.g. bed shortage)

– Health and safety (e.g. fire)

– Information (e.g. breach of confidentiality)

What could go wrong?

## Determine contributory factors 03

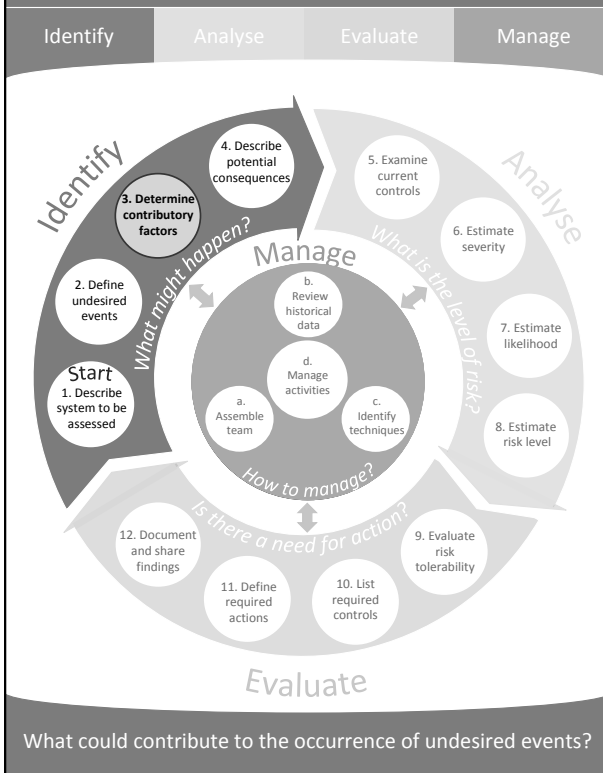

## Determine contributory factors 03

|                 |                                                                                                                             |
|-----------------|-----------------------------------------------------------------------------------------------------------------------------|
| Patient         | Clinical condition, physical factors, social factors and psychological factors                                              |
| Staff           | Physical factors, psychological factors, social factors, cognitive factors, and skills and knowledge                        |
| Task            | Unfamiliar task, difficult task and monotonous task                                                                         |
| Communication   | Poor verbal and written communication, lack of feedback between all stakeholders, and lack of information provided          |
| Equipment       | Poor design, equipment not working, and inadequate maintenance                                                              |
| Control actions | No actions, unsafe actions, actions too late, too early or out of sequence and actions stopped too soon or applied too long |
| Organisational  | Organisational structure, policies, procedures and protocols, staffing/workload factors, training and safety culture        |
| Environmental   | Physical environment, external environment including external authorities and suppliers                                     |

What could contribute to the occurrence of undesired events?

## Describe potential consequences 04

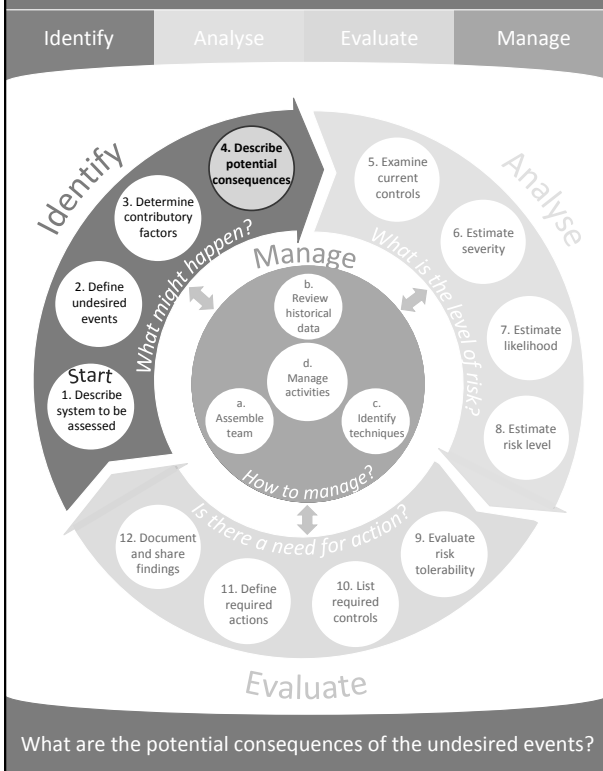

## Describe potential consequences 04

- The following should be considered when describing potential consequences:
- Impacts on people (e.g. harm and delayed treatment)
  - Impacts on organisation (e.g. claims and complaints, staffing, financial loss and reputation)
  - Impacts on environment (e.g. hospital waste and complaints from local residents)
  - Immediate effects
  - Knock-on effects

What are the potential consequences of the undesired events?

## Examine current controls

05

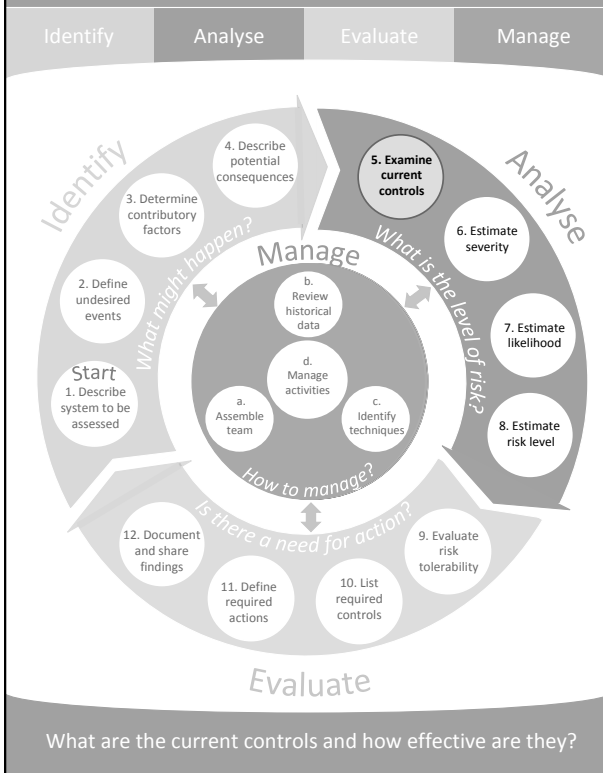

## Examine current controls

05

The following types of controls can be considered when examining current controls:

- Controls to prevent undesired events
- Controls to detect undesired events
- Controls to reduce the severity of the consequences

The effectiveness of the current controls can be categorised as:

- Effective
- Neutral
- Ineffective

What are the current controls and how effective are they?

## Estimate severity

06

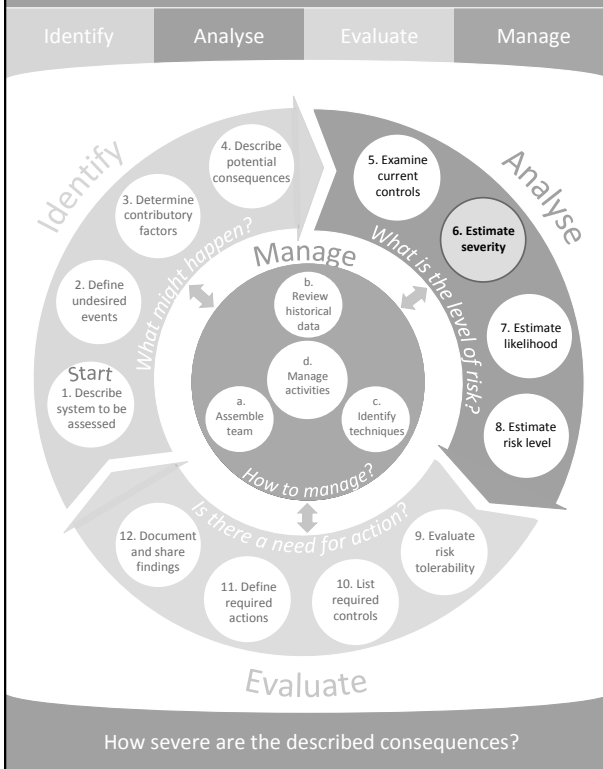

## Estimate severity

06

Severity can be estimated through the use of:

- A rating (see below)
- Consequence descriptions for each impact area (e.g. harm, staffing and reputation)

| Score | Rating       | Descriptions for harm                                  |
|-------|--------------|--------------------------------------------------------|
| 1     | Negligible   | Minimal injury requiring no intervention               |
| 2     | Minor        | Minor injury requiring intervention                    |
| 3     | Moderate     | Moderate injury increasing the length of hospital stay |
| 4     | Major        | Major injury leading to incapacity                     |
| 5     | Catastrophic | Death                                                  |

Source: NPSA, 2008. A risk matrix for risk managers

If a risk might result in different severity of consequences on the same consequence category (e.g. harm), the most worst-credible can be determined.

How severe are the described consequences?

# Estimate likelihood

07

Identify Analyse Evaluate Manage

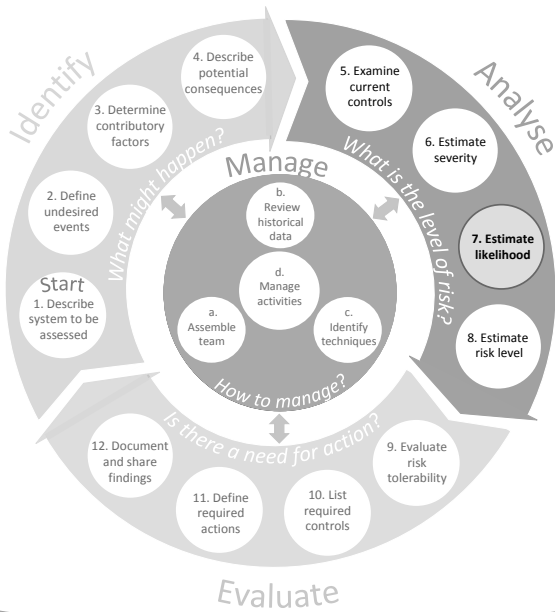

What is the likelihood of occurrence of the consequences?

# Estimate likelihood

07

Likelihood of occurrence can be estimated through the use of:

- A rating (see below)
- Frequency descriptions to be used for continuous operations
- Probability descriptions to be used for one-off projects

| Score | Rating         | Frequency Descriptions          | Probability Descriptions |
|-------|----------------|---------------------------------|--------------------------|
| 1     | Rare           | Not expected to occur for years | <0.1 %                   |
| 2     | Unlikely       | At least annually               | 0.1- 1 %                 |
| 3     | Possible       | At least monthly                | 1- 10 %                  |
| 4     | Likely         | At least weekly                 | 10- 50 %                 |
| 5     | Almost certain | At least daily                  | >50 %                    |

Source: NPSA, 2008. A risk matrix for risk managers

What is the likelihood of occurrence of the consequences?

# Estimate risk level

08

Identify Analyse Evaluate Manage

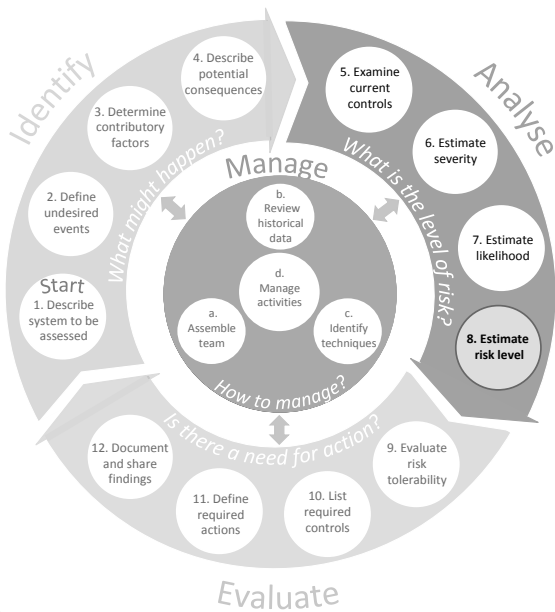

What is the level of risk?

# Estimate risk level

08

Risk level is estimated by:

- Combining the likelihood and consequence of a risk

Risk levels can be categorised as:

- Low (L)
- Medium (M)
- High (H)

|            |                  | Severity     |         |            |         |                |
|------------|------------------|--------------|---------|------------|---------|----------------|
|            |                  | 1 Negligible | 2 Minor | 3 Moderate | 4 Major | 5 Catastrophic |
| Likelihood | 5 Almost certain | M            | M       | H          | H       | H              |
|            | 4 Likely         | L            | M       | M          | H       | H              |
|            | 3 Possible       | L            | L       | M          | M       | H              |
|            | 2 Unlikely       | L            | L       | L          | M       | M              |
|            | 1 Rare           | L            | L       | L          | L       | M              |

What is the level of risk?

## Evaluate risk tolerability

09

Identify Analyse Evaluate Manage

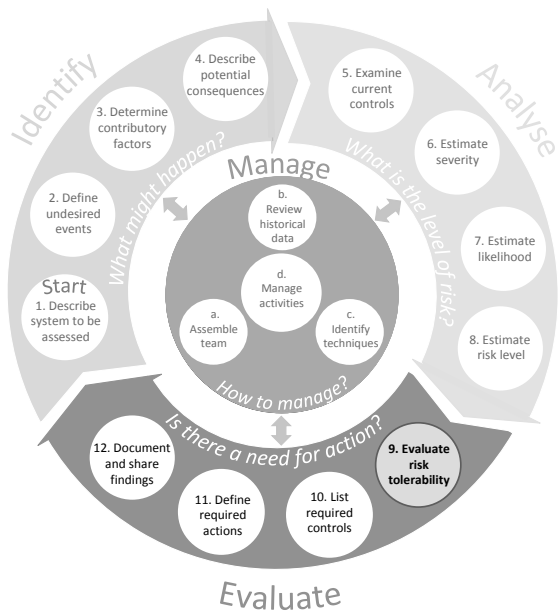

How tolerable is the risk?

## Evaluate risk tolerability

09

The following should be considered when deciding on the tolerability of a risk:

– Risk level

Low risks: generally tolerable

Medium risks: generally undesirable

High risks: generally intolerable

– Written rules (e.g. standards, policies and legal requirements)

– Potential benefits of taking the risk

How tolerable is the risk?

## List required controls

10

Identify Analyse Evaluate Manage

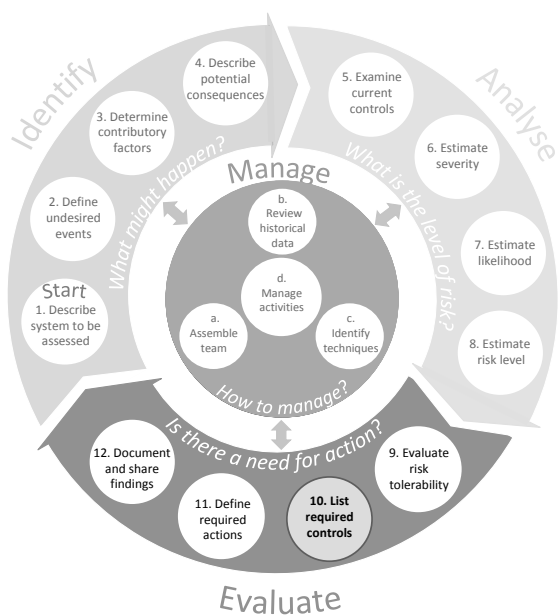

What new controls are required to modify the risk?

## List required controls

10

The following should be considered to list new controls:

– Existing ineffective controls

– Contributory factors

– Controls to prevent undesired events

– Controls to detect undesired events

– Controls to reduce the severity of consequences

Be aware that new controls can raise new risks into the system, and some risks might not be eliminated.

What new controls are required to modify the risk?

## Define required actions 11

11

Identify Analyse Evaluate Manage

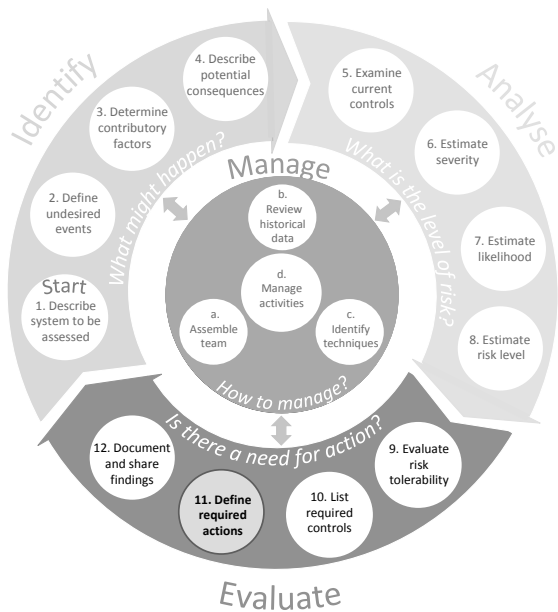

What actions are required to implement the new controls?

## Define required actions 11

11

Required actions involve:

- Creating a list of actions in relation to the new controls
- Action prioritisation by considering the criticality of the risks (e.g. risk level, speed of a risk to manifest itself and its detectability, organisational objectives, rules and legal requirements)
- Management responsibility for these actions (e.g. ward/departmental level for low risks)
- Review frequency

Recommended actions should be 'SMART':

- Specific
- Measureable
- Achievable
- Realistic
- Timely

What actions are required to implement the new controls?

## Document and share findings 12

12

Identify Analyse Evaluate Manage

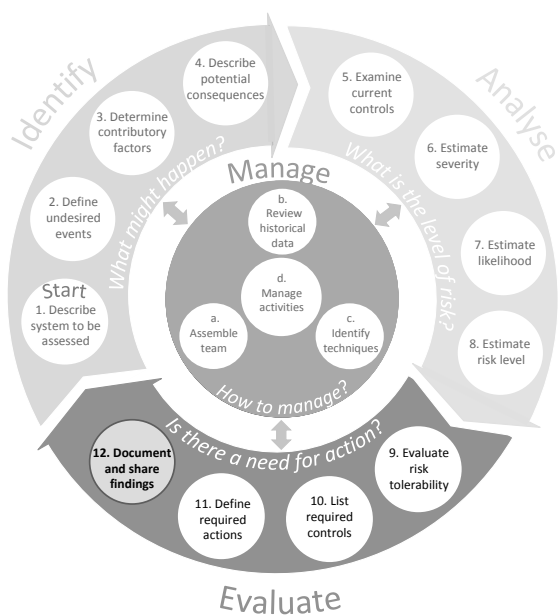

What are the findings and what lessons are learnt?

## Document and share findings 12

12

Documentation of a risk assessment can include:

- Description of the system to be assessed
- Limitations and assumptions made in the assessment
- Assessment methodology
- Risk assessment findings and results
- Discussion of the results
- References

Findings can be shared with others through:

- Reports
- Safety alerts
- Risk newsletters
- Dashboards
- Communication with others

What are the findings and what lessons are learnt?

## Assemble team

a

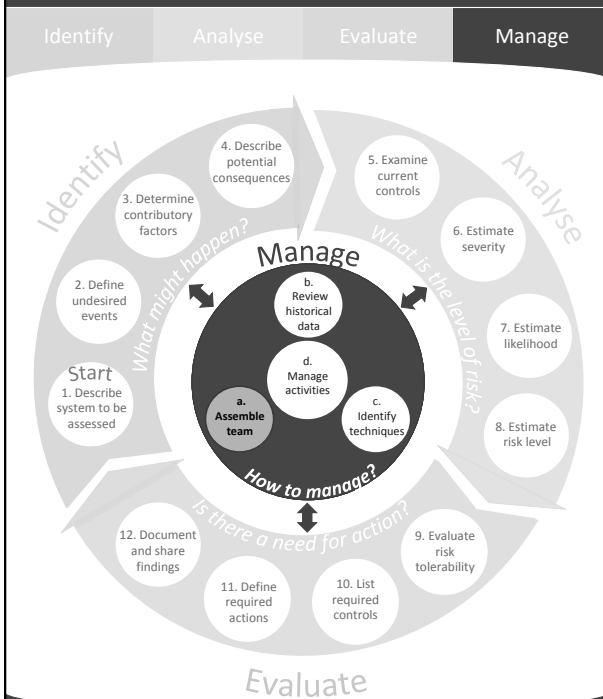

Who should be in the assessment team?

## Assemble team

a

An ideal team should involve at least:

- A facilitator who has experience in risk assessment
- A multidisciplinary group of experts in the system to be assessed

It might also be helpful to have:

- Somebody who is not directly involved in the system to be assessed

Be aware if a team assessment is not appropriate, peer reviewing is recommended to minimise subjectivity of the assessment.

Who should be in the assessment team?

## Review historical data

b

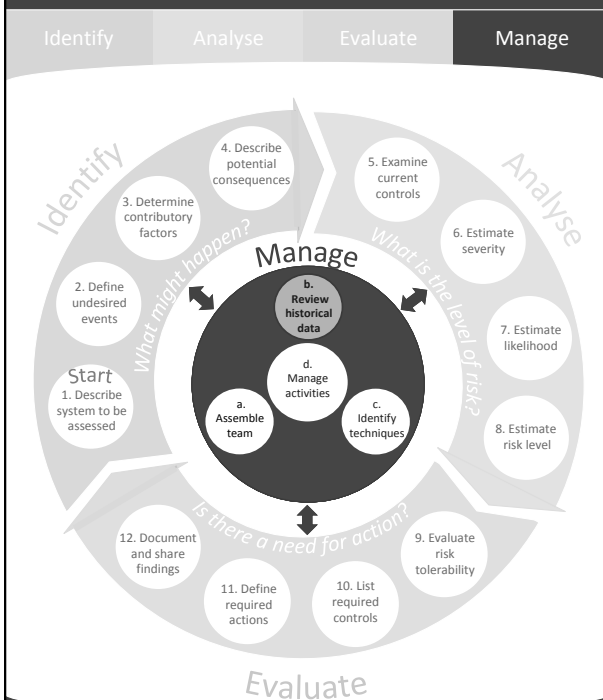

What can be learnt from historical data?

## Review historical data

b

The following documents and data can be used to provide insides from existing data:

- Incident reports
- Patient complaints and claims
- Registered risks
- Quality and performance reports
- Safety alerts
- Audit reports
- Reports from external authorities
- Academic literature

What can be learnt from historical data?



## Identify techniques

C

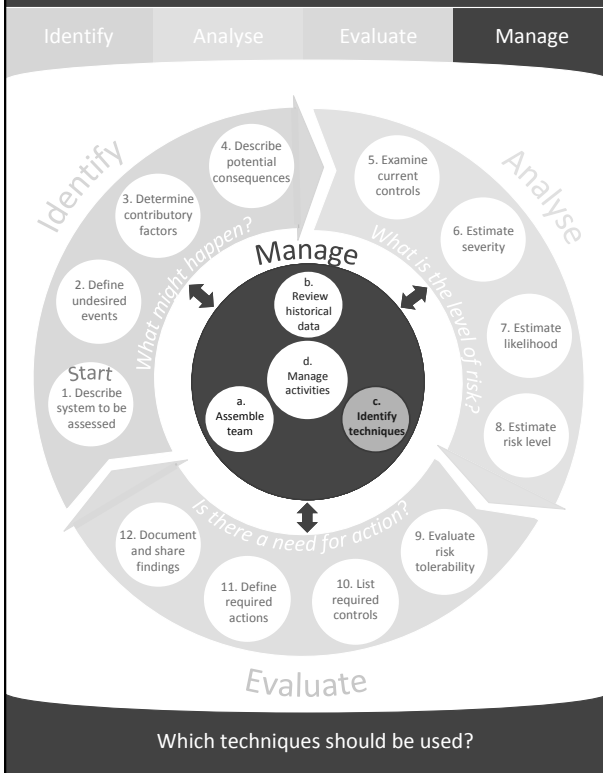

## Identify techniques

C

Techniques to support risk assessment include:

- *System diagrams* or *flow charts* to describe the system to be assessed
- *Peer review* and *team discussion* to improve judgement
- *Brainstorming*, *structured 'what-If' (SWIFT)* and the *Delphi technique* to identify all risks
- *Bow-tie analysis* to display the pathway of an event from its contributory factors to potential consequences, and to examine current controls
- *Failure mode and effects analysis (FMEA)* to identify the way failures could occur and the way they could be treated
- *Risk matrices* to estimate the risk level, to determine risk tolerability and to allocate resources
- Specific risk assessment techniques (e.g. patient falls and moving and handling risk assessment forms)

Which techniques should be used?

## Manage activities

d

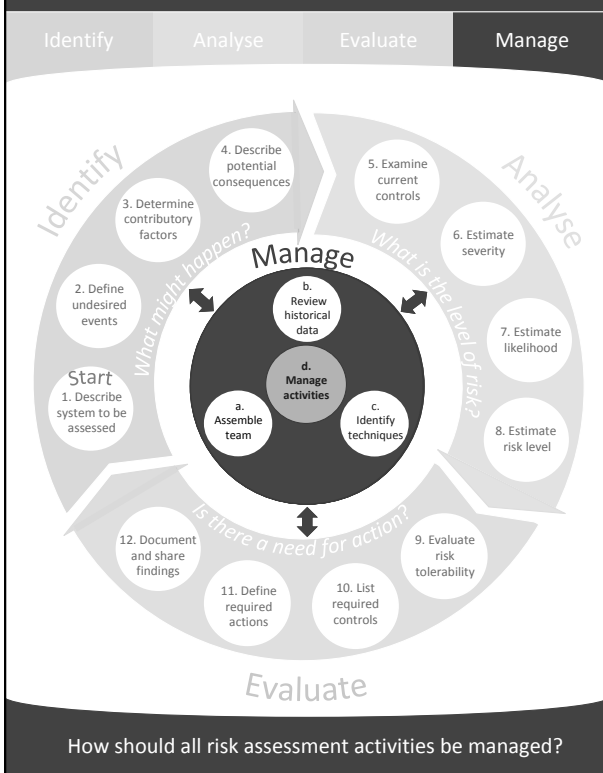

## Manage activities

d

It is essential to determine the following factors when managing the risk assessment process:

- Coordination of all risk assessment activities
- Communication and consultation with all stakeholders of the assessment at all times
- Iterating through all steps of the risk assessment framework
- Monitoring and reviewing assessed risks on a regular basis as well as when there is a change in the system
- Tailoring the framework to fit assessment needs

How should all risk assessment activities be managed?

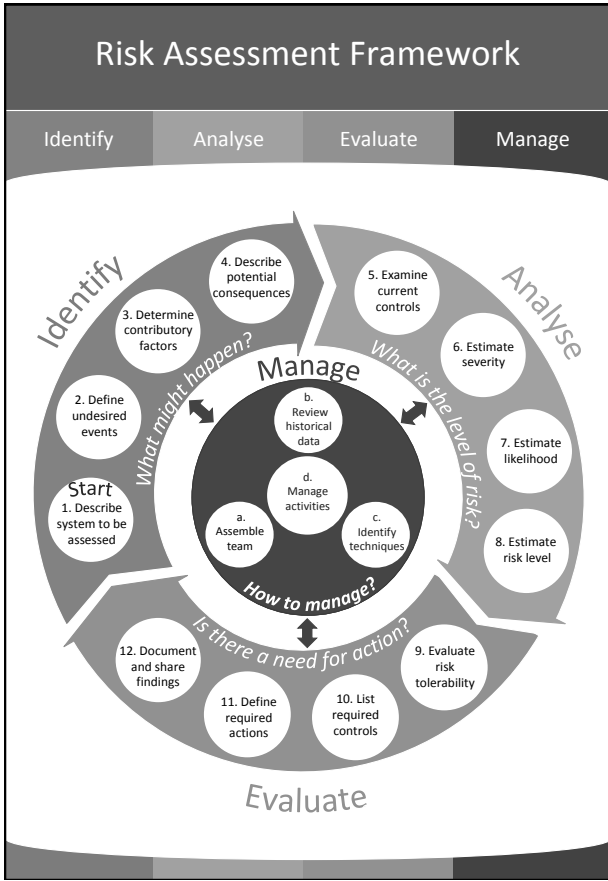

## Risk Assessment Form

|                                                                                    |                                   |                                    |                               |
|------------------------------------------------------------------------------------|-----------------------------------|------------------------------------|-------------------------------|
| Assessor:                                                                          | Ward/Department:                  | Date assessed:                     | Assessment no:                |
| 1. Describe system to be assessed (aim, elements, interactions, boundary, context) |                                   |                                    |                               |
| 2. Define undesired events                                                         | 3. Determine contributory factors | 4. Describe potential consequences | 5. Examine current controls   |
| 6. Estimate Severity                                                               | 7. Estimate likelihood            | 8. Estimate risk level             | 9. Evaluate risk tolerability |
| 10. List required controls                                                         | 11. Define required actions       |                                    |                               |
|                                                                                    |                                   |                                    |                               |
|                                                                                    |                                   |                                    |                               |
|                                                                                    |                                   |                                    |                               |
|                                                                                    |                                   |                                    |                               |
|                                                                                    |                                   |                                    |                               |
